# Supplementary material for: Calsequestrin 1 Is an Active Partner of Stromal Interaction Molecule 2 in Skeletal Muscle
Source: MDPI journal article supplement (doi:10.3390/cells10112821), 2021-10-20
Supplement: s1 [file s1]

# **Calsequestrin 1 is an active partner of stromal interaction molecule 2 in skeletal muscle**

**Seung Yeon Jeong<sup>1,2</sup>, Mi Ri Oh<sup>1,2</sup>, Jun Hee Choi<sup>1,2</sup>, Jin Seok Woo<sup>3</sup>, and Eun Hui Lee<sup>1,2,\*</sup>**

<sup>1</sup>Department of Physiology, College of Medicine, The Catholic University of Korea, Seoul 06591; <sup>2</sup>Department of Biomedicine & Health Sciences, Graduate School, The Catholic University of Korea, Seoul 06591;

<sup>3</sup>Department of Physiology, David Geffen School of Medicine, UCLA, Los Angeles, CA 10833, USA;

\*Correspondence: Eun Hui Lee (ehui@catholic.ac.kr)

## **List of Supplementary Materials**

**Supplementary Table S1.** PCR primers for the cloning of GST-CASQ1 or GST-CASQ1 regions (GST-A to GST-E)

**Supplementary Table S2.** PCR primers for the cloning of GST-C regions (GST-C1 to GST-C5)

**Supplementary Table S3.** PCR primers for the cloning of the C1 region into the pCMS-RFP vector

**Supplementary Table S4.** Expression level of the proteins that mediate or regulate EC coupling, SOCE, or myotube differentiation in the WT CASQ1 or C1-expressing mouse primary skeletal myotubes.

# Supplementary Table S1

PCR primers for the cloning of GST-CASQ1 or GST-CASQ1 regions (GST-A to GST-E)

|           | PCR primers (EcoR I & Xho I) |                                       |
|-----------|------------------------------|---------------------------------------|
| GST-CASQ1 | Forward                      | 5' – GGAATTCATGGGGGCCAGAGCAGTG – 3'   |
|           | Backward                     | 5' – CGCTCGAGCTAGTCGTCGTCATCATC – 3'  |
| GST-A     | Forward                      | 5' – GGAATTCATGGGGGCCAGAGCAGTG – 3'   |
|           | Backward                     | 5' – CGCTCGAGCTACATCTCCATCCATATG – 3' |
| GST-B     | Forward                      | 5' – GGAATTCGATAACGAGGAGGACCTG – 3'   |
|           | Backward                     | 5' – CGCTCGAGCTAGTCGTCGTCATCATC – 3'  |
| GST-C     | Forward                      | 5' – GGAATTCATGGGGGCCAGAGCAGTG – 3'   |
|           | Backward                     | 5' – CGCTCGAGCTAAATCAACTCTACAG – 3'   |
| GST-D     | Forward                      | 5' – GGAATTCGAAGGTGAACGAGAGC – 3'     |
|           | Backward                     | 5' – CGCTCGAGCTACTCTAAGAACTC – 3'     |
| GST-E     | Forward                      | 5' – GGAATTCACTCTCAAGGCTGTGG – 3'     |
|           | Backward                     | 5' – CGCTCGAGCTAGTCGTCGTCATCATC – 3'  |

## Supplementary Table S2

**PCR primers for the cloning of GST-C regions (GST-C1 to GST-C5)**

|        | PCR primers (EcoR I & Xho I) |                                      |
|--------|------------------------------|--------------------------------------|
| GST-C1 | Forward                      | 5' – GGAATTCATGGGGGCCAGAGCAGTG – 3'  |
|        | Backward                     | 5' – CGCTCGAGCTACAGGATTAG – 3'       |
| GST-C2 | Forward                      | 5' – GGAATTCGAGTTAGCAG – 3'          |
|        | Backward                     | 5' – CGCTCGAGCTAAATCAACTCTACAG – 3'  |
| GST-C3 | Forward                      | 5' – GGAATTCATGGGGGCCAGAGCAGTG – 3'  |
|        | Backward                     | 5' – CGCTCGAGCTAATCCTTCTCTGAGTC – 3' |
| GST-C4 | Forward                      | 5' – GGAATTCGCAGCTGTGGCCAAGAAA – 3'  |
|        | Backward                     | 5' – CGCTCGAGCTACTCGCCGTCATATTC – 3' |
| GST-C5 | Forward                      | 5' – GGAATTCTTTTCTGCAGAC – 3'        |
|        | Backward                     | 5' – CGCTCGAGCTAAATCAACTCTACAG – 3'  |

# Supplementary Table S3

PCR primers for the cloning of the C1 region into the pCMS-RFP vector

|           | PCR primers (EcoR I & Sal I) |                                   |
|-----------|------------------------------|-----------------------------------|
| C1 region | Forward                      | 5'- GGAATTCATGGGGGCCAGAGCAGTG -3' |
|           | Backward                     | 5'- GCGTCGACTCACAGGATTAGCTCC -3'  |

## Supplementary Table S4

**Expression level of the proteins that mediate or regulate EC coupling, SOCE, or myotube differentiation in the WT CASQ1 or C1-expressing mouse primary skeletal myotubes.**  $\alpha$ -actin was used as a loading control. Three independent experiments per protein were conducted. The values are presented as the mean  $\pm$  SEM for three independent experiments. The expression level of protein was normalized to the mean value of the vector control. \*Significant difference compared with vector control ( $p < 0.05$ ). #Significant difference compared with WT CASQ1 ( $p < 0.05$ ).

|          | Vector control  | WT CASQ1        | C1                   |
|----------|-----------------|-----------------|----------------------|
| MyoD     | 1.00 $\pm$ 0.00 | 1.02 $\pm$ 0.09 | 0.98 $\pm$ 0.06      |
| Myogenin | 1.00 $\pm$ 0.00 | 0.97 $\pm$ 0.07 | 1.00 $\pm$ 0.09      |
| RyR1     | 1.00 $\pm$ 0.00 | 1.01 $\pm$ 0.08 | 0.98 $\pm$ 0.08      |
| DHPR     | 1.00 $\pm$ 0.00 | 1.01 $\pm$ 0.13 | 1.02 $\pm$ 0.13      |
| SERCA1a  | 1.00 $\pm$ 0.00 | 0.97 $\pm$ 0.15 | 0.97 $\pm$ 0.13      |
| TRPC1    | 1.00 $\pm$ 0.00 | 0.98 $\pm$ 0.13 | 1.02 $\pm$ 0.12      |
| TRPC3    | 1.00 $\pm$ 0.00 | 1.01 $\pm$ 0.08 | 0.98 $\pm$ 0.08      |
| TRPC4    | 1.00 $\pm$ 0.00 | 1.00 $\pm$ 0.15 | 0.99 $\pm$ 0.13      |
| TRPC6    | 1.00 $\pm$ 0.00 | 1.02 $\pm$ 0.09 | 0.71 $\pm$ 0.11 *, # |
| TRIM32   | 1.00 $\pm$ 0.00 | 0.97 $\pm$ 0.09 | 0.98 $\pm$ 0.08      |
| Orai1    | 1.00 $\pm$ 0.00 | 1.02 $\pm$ 0.07 | 1.03 $\pm$ 0.04      |
| STIM1    | 1.00 $\pm$ 0.00 | 0.98 $\pm$ 0.07 | 0.99 $\pm$ 0.11      |
| STIM2    | 1.00 $\pm$ 0.00 | 1.02 $\pm$ 0.07 | 1.04 $\pm$ 0.09      |
| CSQ1     | 1.00 $\pm$ 0.00 | 1.00 $\pm$ 0.07 | 1.01 $\pm$ 0.07      |
| JP1      | 1.00 $\pm$ 0.00 | 0.99 $\pm$ 0.09 | 1.01 $\pm$ 0.07      |
| JP2      | 1.00 $\pm$ 0.00 | 1.04 $\pm$ 0.11 | 0.97 $\pm$ 0.09      |
| CaM1     | 1.00 $\pm$ 0.00 | 0.98 $\pm$ 0.08 | 0.61 $\pm$ 0.17 *, # |
